# Supplementary material for: Carbonylation of dimethyl ether over Co-HMOR
Source: Royal Society of Chemistry journal article supplement (doi:10.1039/c8cy00407b), 2018-01-01
Supplement: c8cy00407b1.pdf [file c8cy00407b1.pdf]

## Electronic Supplementary Information (ESI)

### Carbonylation of dimethyl ether over Co-HMOR

Meng Ma,<sup>a,b</sup> Ensheng Zhan,<sup>a\*</sup> Xiumin Huang,<sup>a</sup> Na Ta,<sup>a</sup> Zhiping Xiong,<sup>a,b</sup> Luyi Bai<sup>a</sup>, Wenjie Shen<sup>a\*</sup>

<sup>a</sup>State Key Laboratory of Catalysis, Dalian Institute of Chemical Physics, Chinese Academy of Sciences, Dalian 116023, China

<sup>b</sup>University of Chinese Academy of Sciences, Beijing 100049, China

\*Corresponding author. E-mail: eszhan@dicp.ac.cn; shen98@dicp.ac.cn

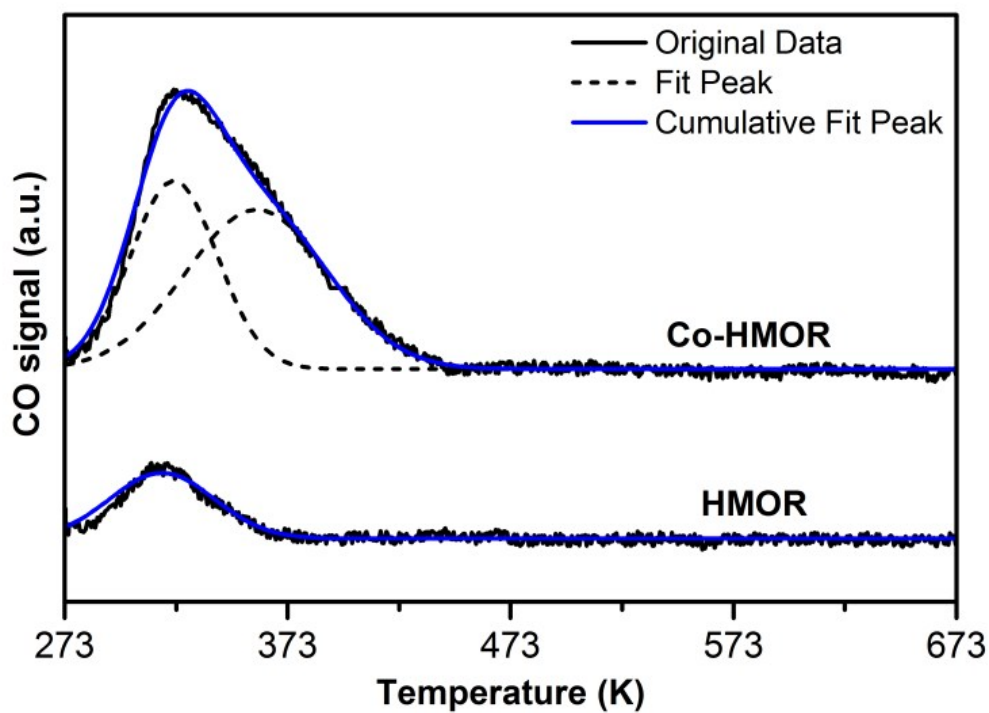

Fig. S1 CO-TPD profiles of the Co-HMOR and HMOR samples.

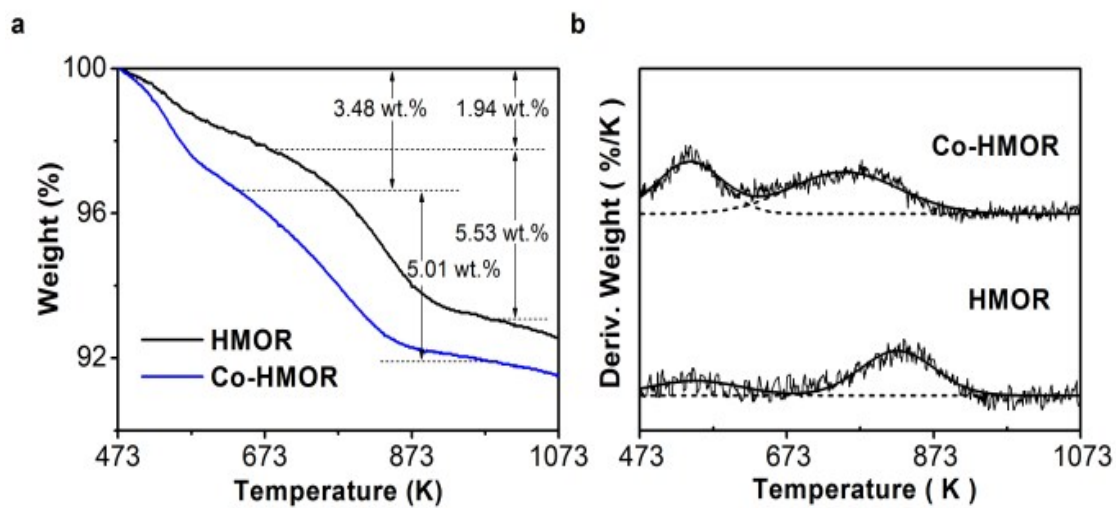

Fig. S2 TG (a) and DTG (b) profiles of the spent Co-HMOR and HMOR catalysts.
